# Supplementary material for: Prevalence of Dental Caries in Pakistan. A systematic review and meta-analysis
Source: Research Square preprint supplement (doi:10.21203/rs.3.rs-117918/v2), 2021-01-25
Supplement: Supplementary file 1 [file 2626dd36898e7af11b4706d0.docx]

| **Authors** | **Year** | **Age group**  **(Years)** | **City/ Province** | **Type of dentition** | **Method of Caries diagnosis** | **Sample size (n)**  **No. of people examined** | **Prevalence of dental caries (n)** |
| --- | --- | --- | --- | --- | --- | --- | --- |
| Umer & Umer [19] | 2011 | 8-10 years | Peshawar/KPK | Mixed dentition | WHO criteria | 500 | 362 |
| Tahir et al. [20] | 2015 | 5-12 years | Multan/Punjab | Mixed dentition | Not reported | 152 | 94 |
| Shaikh et al. [21] | 2014 | 9-18 years | Khairpur/Sindh | Permanent Dentition | WHO criteria | 406 | 57 |
| Ilyas et al. [22] | 2015 | Not reported | Hyderabad/Sindh | - | WHO criteria | 278 | 168 |
| Ali et al. [23] | 2012 | 5-14 years | Lahore/Punjab | Mix dentition | WHO criteria | 1673 | 1188 |
| Malik et al. [24] | 2014 | Not reported | Karachi/ Sindh | Permanent Dentition | Caries Assessment Spectrum and treatment(CAST),third molars were not included | 100 | 8 |
| Umer et al. [25] | 2016 | 3-12 years | Sargodha/Punjab | Mix dentition | Presence of Frank Cavity | 518 | 238 |
| Dawani et al. [26] | 2012 | 3-6 years | Karachi/Sindh | Primary dentition | WHO criteria | 1000 | 510 |
| Sahito et al. [27] | 2015 | 8-12 year | Hyderabad/Sindh | Mix dentition | Not reported | 100 | 90 |
| Sufia et al. [28] | 2011 | 3-5 Years | Lahore/Punjab | Primary dentition | WHO criteria | 601 | 243 |
| Ahmed et al. [29] | 2017 | 6-12 years | Hyderabad/Sindh | Mix dentition | WHO criteria | 395 | 196 |
| Sami et al. [30] | 2016 | 12 years | Quetta/Baluchistan | Permanent dentition | WHO criteria | 349 | 81 |
| Masoud et al. [31] | 2020 | 3-5 years | Islamabad | Primary dentition | WHO criteria | 384 | 189 |
| Badar et al. [32] | 2012 | 11- 70 years | Bahawalpur/Punjab | Permanent dentition | Not reported | 400 | 388 |
| Khan et al. [33] | 2019 | 12 years and above | Islamabad | Permanent dentition | Not reported | 349 | 312 |
| Leghari et al. [34] | 2014 | 1. 15 years | Karachi/Sindh | Permanent dentition | WHO criteria | 392 | 274 |
| Mohiuddin et al. [35] | 2015 | 6 and 12 years | Karachi/Sindh | Mix dentition | WHO criteria | 1600 | 1114 |
| Mirza et al. [36] | 2017 | 2-19 years | Lahore/Punjab | Mix dentition | WHO criteria | 12,971 | 7409 |
| Mirza et al. [37] | 2013 | 3-8 years | Lahore/ Punjab | Primary dentition | WHO criteria | 642 | 391 |
| Rafiq et al. [38] | 2019 | 20-80 years | Karachi/Sindh | Permanent dentition | Clinical assessment of dental caries done by DMFT | 377 | 370 |
| Jawed et al. [39] | 2020 | 6-18 years | Karachi/Sindh | Mix dentition | WHO criteria | 196 | 114 |
| Fatima javed. [40] | 2019 | 18-29 years | Faisalabad/Punjab | Permanent dentition | Not reported | 571 | 74 |
| Umm-E-Aiman et al. [41] | 2018 | 6, 12 & 15 years age | Multan/Punjab | Mix dentition | WHO criteria | 500 | 320 |
| Baloch et al. [42] | 2009 | 12 years old | Quetta/Baluchistan | Permanent dentition | Not reported | 153 | 124 |
| Mehmood et al. [43] | 2017 | 5-6 years | Rawalpindi/Punjab | Primary dentition | WHO criteria | 384 | 195 |
| Rashid et al. [44] | 2016 | Not reported | Sialkot/Punjab | - | WHO criteria | 1008 | 447 |
| Nayani et al. [45] | 2018 | 5-14 years | Karachi/Sindh | Mix dentition | Dental examination was done indoor by using small wooden spatula and a common hand torch light. Wooden spatula was used to retract the tongue and cheeks | 500 | 336 |
| Kamran et al. [46] | 2017 | 4-17 years | Rawalpindi/Punjab | Mix dentition | WHO criteria | 753 | 262 |
| Khan et al. [47] | 2017 | 12-17 | Peshawar/KPK | Permanent dentition | Not reported | 400 | 110 |
| Taqi et al. [48] | 2018 | 11-12 years | Bhakkar/Punjab | Mix dentition | International Caries Detection and Assessment System ICDAS | 226 | 115 |

**Table 2.** The characteristics of included studies in meta-analysis
